# Supplementary material
Source: publisher figshare collection journal article supplement (https://gsajournals.figshare.com/articles/dataset/_/10248929)
Supplement: Supplementary file 1 [file 1]

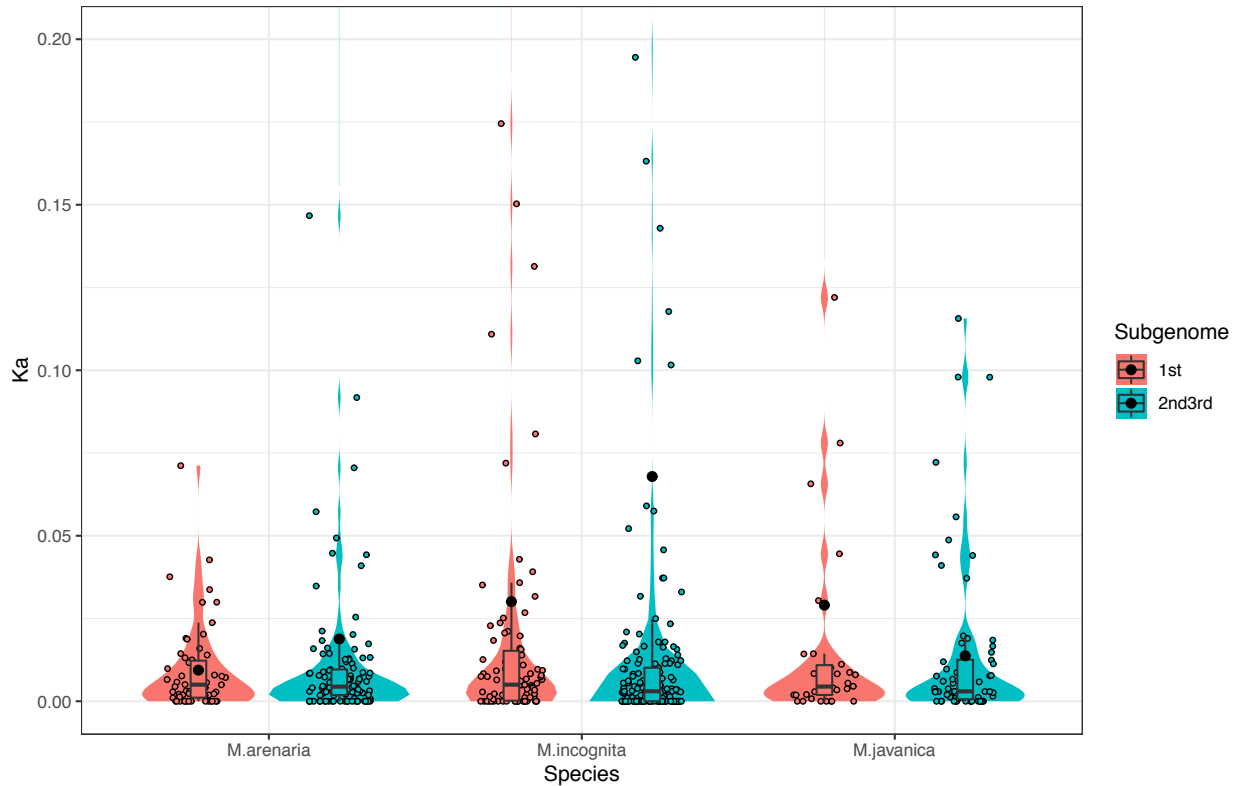

**Figure S1:** Distribution of  $K_a$  values for the three MIG genomes for the different parental subgenomes. Violin and box plots show the distributions of  $K_a$  for genes from the more fractionated subgenome ( $S_1$  in Figure 2) and the combination of two less fractionated subgenomes. Black dots show the mean of all  $K_a$  values in each group. P-values are from one-sided Mann-Whitney  $U$  tests of differences between the median of  $K_a$  values in subgenome 1 and the median of  $K_a$  values in subgenomes 2 & 3. *M. arenaria*  $P = 0.5006$ , *M. incognita*  $P = 0.01712$ , *M. javanica*  $P = 0.2838$ .
